# Supplementary material
Source: publisher figshare collection journal article supplement (https://acs.figshare.com/ndownloader/files/4642885)
Supplement: Supplementary file 1 [file 4642885]

**Supporting Information**

**for the paper**

**“Understanding the Electronic  
Structure, Reactivity, and Hydrogen  
Bonding for a 1,2-Diphosphonium  
Dication”**

**David J. Wolstenholme<sup>\*,†</sup>, Jan J. Weigand<sup>‡,†</sup>, Reagan Davidson<sup>†</sup>, Jason K. Pearson<sup>†</sup>,  
T. Stanley Cameron<sup>†</sup>**

*Department of Chemistry, Dalhousie University, Halifax, Nova Scotia, Canada, B3H 4J3,  
and Westfälische Wilhelms-Universität Münster, Institut für Anorganische und  
Analytische Chemie, Corrensstrasse 30/36, D-48149 Münster, Germany*

\* To whom the correspondence should be addressed. D. W.: phone, +1-(902)-494-3759,  
e-mail, [dwolsten@dal.ca](mailto:dwolsten@dal.ca).

† Dalhousie University

‡ Westfälische Wilhelms-Universität Münster

## Spherical and Multipole Refinement Details

A sweep of the data was performed using  $\omega$  scans from  $20.0^\circ$  to  $200.0^\circ$  in steps of  $5.0^\circ$  at  $\chi = 0$  and  $\Phi = 0$ . A second sweep was then performed using  $\omega$  scans from  $20.0^\circ$  to  $95.0^\circ$  in steps of  $5.0^\circ$  at  $\chi = 54.0^\circ$  and  $\Phi = 180.0^\circ$ . The exposure rate in both sweeps was  $20.0$  [min/ $5.0^\circ$ ]. The crystal-to-detector distance was fixed throughout the data collection to  $127.4$  mm.

## Residual Maps

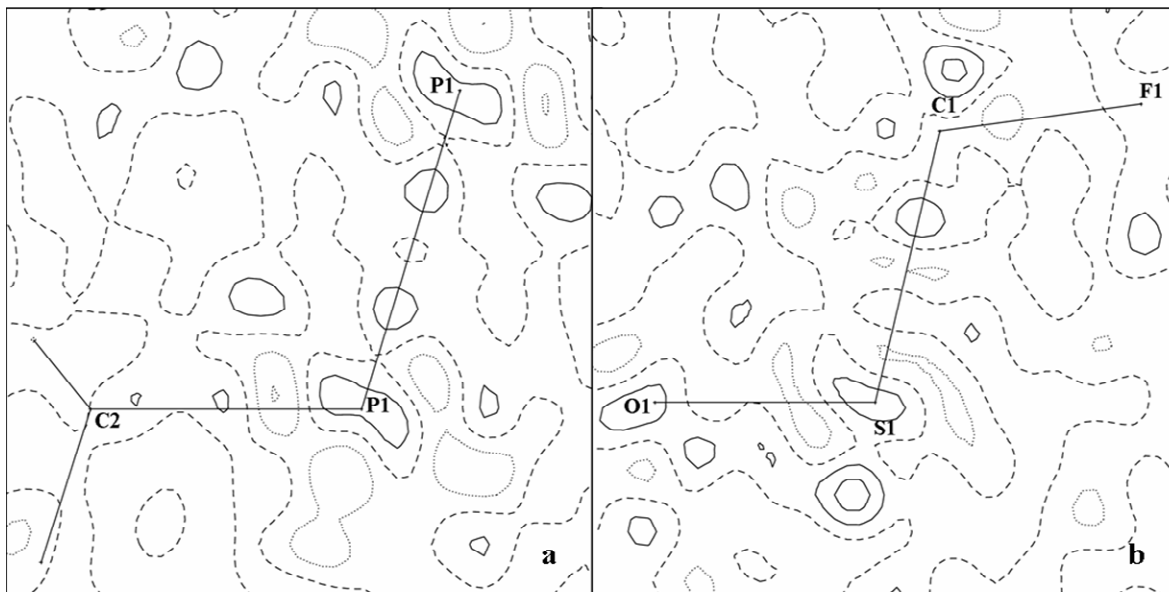

**Figure S1:** Residual density map with positive contours as solid lines, negative contours as dotted lines, and the zero contour line as dashes. All contours are in intervals of  $0.1 \text{ e}\text{\AA}^{-3}$ . (a) C2-P1-P1 plane of the dication with  $\Delta\rho_{\text{min/max}} = -0.209/0.157 \text{ e}\text{\AA}^{-3}$  (b) O1-S1-C1 plane of the triflate anion with  $\Delta\rho_{\text{min/max}} = -0.195/0.259 \text{ e}\text{\AA}^{-3}$

## Crystal Packing Diagrams

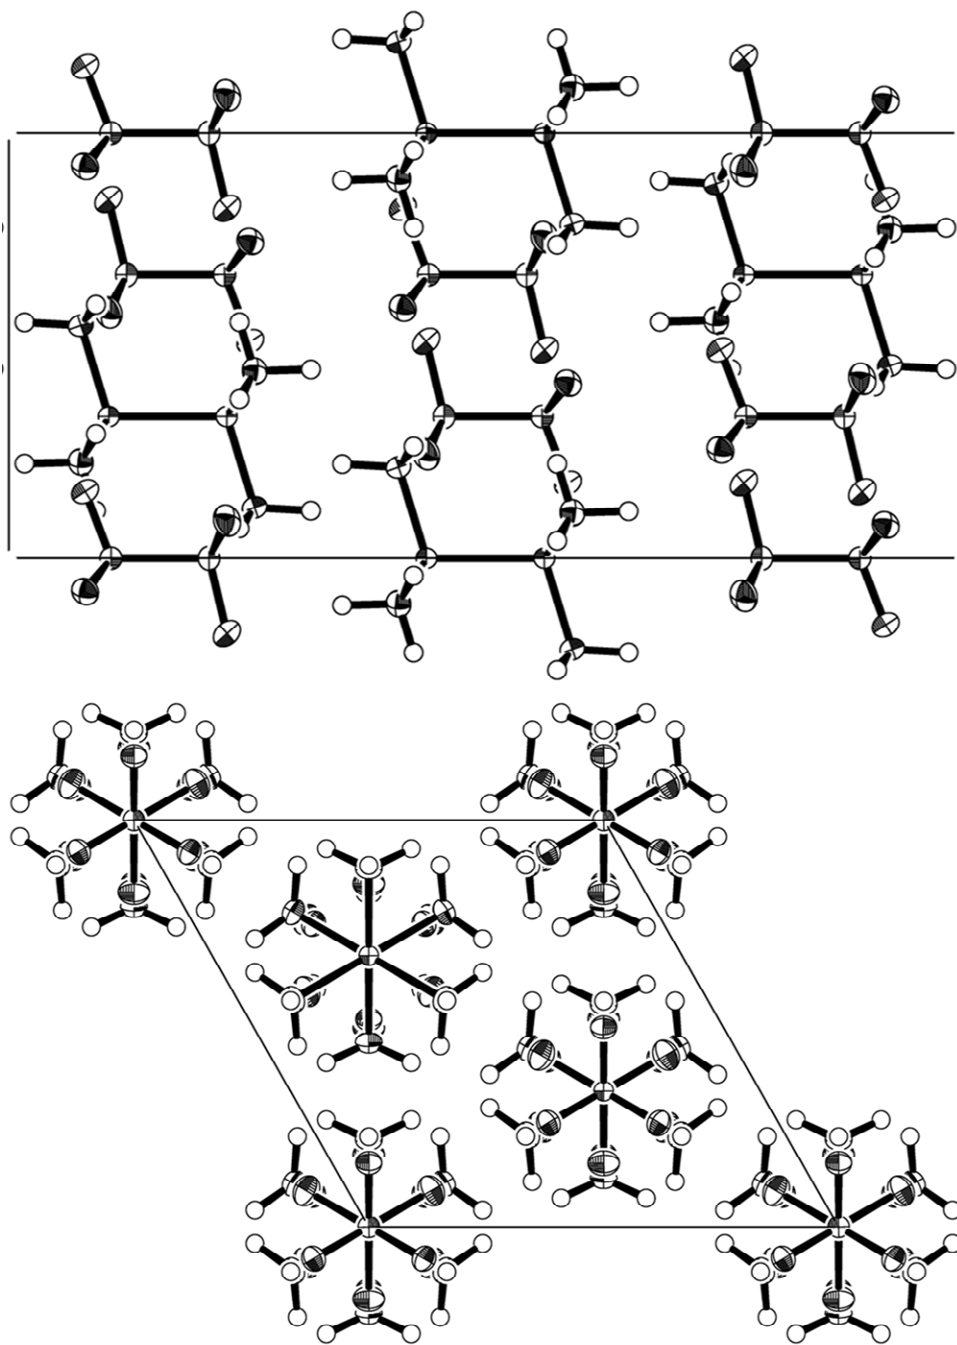

**Figure S2:** Packing diagram for hexamethyldiphosphonium triflate viewed down a axis and c axis

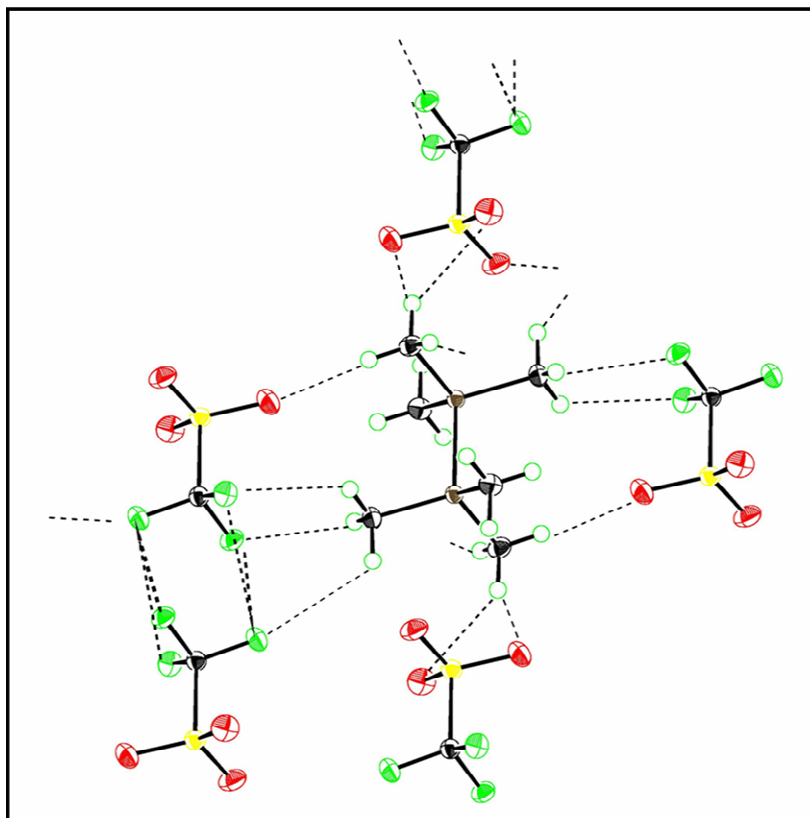

**Figure S3:** Packing diagram showing several of the close contacts used to stabilize the crystalline structure of hexamethyldiphosphonium triflate

## Static Maps

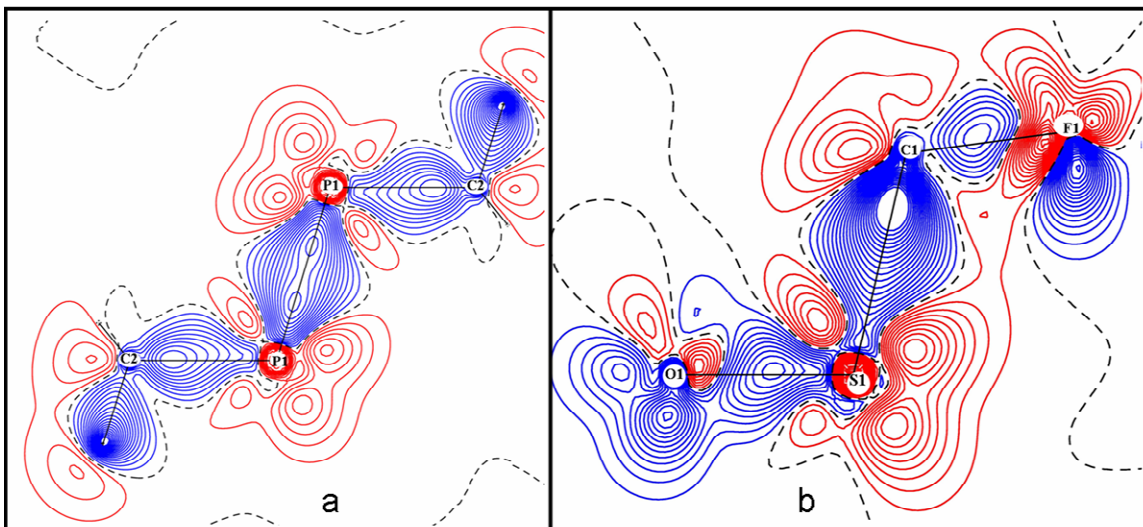

**Figure S4:** Static deformation maps of (a) the C-P-P plane of the dication and (b) the O-S-C plane of the triflate. The blue contours represent the positive electron distribution and the red contours represent the negative electron distribution. The dashed lines represent the zero contour line. All contours are taken in 0.05 eÅ<sup>-3</sup> intervals.

## Laplacian Map

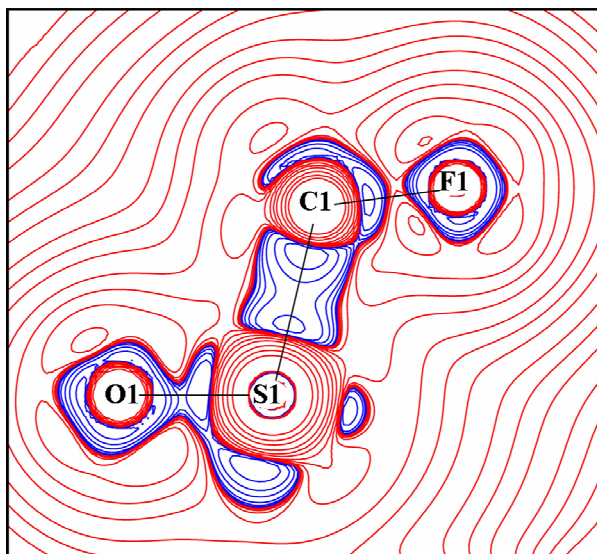

**Figure S5:** Laplacian distribution in the plane of the triflate anion of hexamethyldiposphonium triflate. The contours are drawn at logarithmic intervals in  $-\nabla^2\rho_b(\mathbf{r})$ , shown in positive (blue) and negative (red) contours.

**Theoretical Properties of the Bond Critical Points for  
Hexamethyldiphosphonium Triflate**

| bond  | $\rho_b(\mathbf{r})$<br>(eÅ <sup>-3</sup> ) | $\nabla^2\rho_b(\mathbf{r})$<br>(eÅ <sup>-5</sup> ) | $\lambda_1$<br>(eÅ <sup>-5</sup> ) | $\lambda_2$<br>(eÅ <sup>-5</sup> ) | $\lambda_3$<br>(eÅ <sup>-5</sup> ) | $R_{ij}$<br>(Å) |
|-------|---------------------------------------------|-----------------------------------------------------|------------------------------------|------------------------------------|------------------------------------|-----------------|
| P1-P1 | 0.82                                        | -4.45                                               | -3.50                              | -3.50                              | 2.56                               | 2.240           |
| P1-C2 | 1.16                                        | -5.74                                               | -5.46                              | -5.25                              | 4.98                               | 1.815           |
|       | 1.16                                        | -5.75                                               | -5.46                              | -5.25                              | 4.96                               | 1.816           |
|       | 1.16                                        | -5.75                                               | -5.46                              | -5.25                              | 4.96                               | 1.816           |
| O1-S1 | 1.86                                        | 19.65                                               | -11.08                             | -10.40                             | 41.14                              | 1.488           |
|       | 1.86                                        | 19.67                                               | -11.08                             | -10.41                             | 41.16                              | 1.488           |
|       | 1.86                                        | 19.65                                               | -11.08                             | -10.40                             | 41.13                              | 1.488           |
| S1-C1 | 1.28                                        | -8.98                                               | -7.82                              | -7.82                              | 6.66                               | 1.877           |
| C1-F1 | 1.88                                        | -6.63                                               | -15.66                             | -13.32                             | 22.35                              | 1.343           |
|       | 1.88                                        | -6.63                                               | -15.66                             | -13.32                             | 22.36                              | 1.343           |
|       | 1.88                                        | -6.62                                               | -15.66                             | -13.32                             | 22.35                              | 1.343           |
